# Supplementary material for: Metallofullerenol Gd@C82(OH)22 distracts the proline-rich-motif from putative binding on the SH3 domain
Source: Royal Society of Chemistry journal article supplement (doi:10.1039/c3nr33756a), 2013-01-01
Supplement: c3nr33756a.pdf [file c3nr33756a.pdf]

## **Supplementary Information**

### **Metallofullerenol Gd@C<sub>82</sub>(OH)<sub>22</sub> Distracts Proline-Rich-Motif from Putative Binding on SH3 domain**

Seung-gu Kang<sup>1</sup>, Tien Huynh<sup>1</sup> and Ruhong Zhou<sup>1,2,\*</sup>

<sup>1</sup>Computational Biology Center, IBM Thomas J. Watson Research Center  
Yorktown Heights NY, 10598 USA

<sup>2</sup>Department of Chemistry, Columbia University, New York, NY 10027 USA

\*Corresponding author: [ruhongz@us.ibm.com](mailto:ruhongz@us.ibm.com)

**Figure S1.** Contribution of hydrogen bonding and hydrophobic packing (denoted by contact surface area) of  $\text{Gd@C}_{82}(\text{OH})_{22}$  in its binding to SH3 domain. The number of hydrogen bonds between  $\text{Gd@C}_{82}(\text{OH})_{22}$  and SH3 domain is found to be roughly proportional to their contact surface area during this binding process. Our analysis also shows that  $\text{Gd@C}_{82}(\text{OH})_{22}$  can form up to 10 hydrogen bonds with SH3 domain, along with  $\sim 260 \text{ \AA}^2$  contact surface area. This indicates both the specific hydrogen bonding and non-specific hydrophobic packing contribute to the  $\text{Gd@C}_{82}(\text{OH})_{22}$ 's binding with SH3 domain.

**Figure S2.** Time evolution of native contacts (ratios against X-ray structure) between PRM and SH3 domain. While native contacts are frequently observed between SH3 and PRM with no  $\text{Gd@C}_{82}(\text{OH})_{22}$  in presence (panel **a**), the addition of  $\text{Gd@C}_{82}(\text{OH})_{22}$  nanoparticles is shown to seriously interfere PRM's interaction with SH3 with no obvious native contacts seen (panel **b**). In the absence of  $\text{Gd@C}_{82}(\text{OH})_{22}$ , we found 2 trajectories out of total 7 showing that PRM is bound almost perfectly at the native binding site of SH3 domain.
